## ■ LABORATORY INVESTIGATIONS

Anesthesiology

1996; 84:1119-28

© 1996 American Society of Anesthesiologists, Inc.

Lippincott-Raven Publishers

### ***Effects of Preemptive or Postinjury Intrathecal Local Anesthesia on Persistent Nociceptive Responses in Rats***

#### ***Confounding Influences of Peripheral Inflammation and the General Anesthetic Regimen***

Kiran Yashpal, Ph.D.,\* Joel Katz, Ph.D.,† Terence J.Coderre, Ph.D.‡

**Background:** Although experimental evidence indicates that preemptive intrathecal treatment with local anesthetics reduces postinjury neuronal hyperexcitability, clinical evidence indicates that preemptive treatments do not consistently reduce postoperative pain. The current study used experimental models of postinjury nociception, in which rats received subcutaneous or intraarticular injections of the irritant formalin, to evaluate the effects of peripheral inflammation, or the use of agents supplemental to anesthesia, as possible confounding influences on the effectiveness of preinjury and postinjury intrathecal local anesthetic treatments.

**Methods:** In experiment 1, lumbar intrathecal lidocaine (30  $\mu$ l, 2%), given either 5 min before or 5 min after hind paw injection of 50  $\mu$ l of varying concentrations of formalin, was

compared with intrathecal cerebrospinal fluid, for their effects on nociceptive responses in the late phase of the formalin test. Furthermore, the effect of hind paw injection of 50  $\mu$ l of 2.5, 3.75, or 5.0% formalin on peripheral inflammation was assessed by measuring plasma extravasation in the hind paws of rats given Evans Blue dye (50 mg/kg, intravenous). In experiment 2, rats received a deep tissue injury (100  $\mu$ l of 5.0% formalin into the knee joint) while under halothane anesthesia. In addition to halothane (3-4%), rats received either saline, pentobarbital (13 mg/kg, intraperitoneal), or pentobarbital + morphine (0.5 mg/kg, intravenous), with or without preinjury or postinjury spinal anesthesia using intrathecal bupivacaine (30  $\mu$ l, 0.75%), to assess the effects of supplemental treatments on the preemptive effects of intrathecal bupivacaine.

**Results:** Lumbar intrathecal lidocaine pretreatment, but not posttreatment, significantly reduced late phase nociceptive responses to hind paw injections of 2.5% formalin. The preemptive effects of lidocaine were overridden in rats that received hind paw injections of 3.75 and 5.0% formalin. Hind paw injection of 50  $\mu$ l of 3.75 or 5.0%, but not 2.5% formalin produced an increase in plasma extravasation. Either pentobarbital or pentobarbital + morphine treatment, or a pentobarbital + morphine treatment and postinjury treatment with intrathecal bupivacaine failed to produce a significant reduction in the nociceptive response to the deep tissue injury. However, rats that received pentobarbital + morphine treatments and intrathecal bupivacaine before the injury had significantly reduced nociceptive responses to deep tissue injury when compared to the saline control group, but not to the group that received pentobarbital + morphine treatment and postinjury treatment with bupivacaine.

**Conclusions:** The current results attest to the important effects of ongoing inputs from inflamed tissue, and the use of supplemental treatments, as important confounding factors that may influence the effectiveness of preemptive spinal anesthesia for postoperative pain. (Key Words: Analgesia: preemptive. Anesthesia, local: intrathecal. Pain: postoperative. Spinal cord: nociception. Test: formalin.)

A growing body of clinical data shows that preoperative local<sup>1-4</sup> or epidural/spinal<sup>4-6</sup> anesthesia, or the

This article is accompanied by an editorial. Please see: Kissin I: Preemptive analgesia: Why its effect is not always obvious. ANESTHESIOLOGY 1996; 84:1015-9.

\* Research Associate, Pain Mechanisms Laboratory, Clinical Research Institute of Montreal;

† Assistant Professor, Departments of Behavioral Science and Anesthesia, University of Toronto; Department of Psychology and Acute Pain Research Unit, The Toronto Hospital.

‡ Director, Pain Mechanisms Laboratory, Clinical Research Institute of Montreal; Associate Member, Department of Psychology, McGill University; Chercheur Adjoint, Centre de recherche en sciences neurologiques et Département de médecine, Université de Montréal.

Received from the Pain Mechanisms Laboratory, Clinical Research Institute of Montreal, Montreal, Canada. Submitted for publication July 11, 1995. Accepted for publication January 4, 1996. Supported by grants from the Medical Research Council of Canada to Dr. Coderre and Dr. Katz.

Address reprint requests to Dr. Coderre: Director, Pain Mechanisms Laboratory, Clinical Research Institute of Montreal, 110 Pine Avenue West, Montreal, Quebec, H2W 1R7 Canada. Address electronic mail to: coderrt@ircm.umontreal.ca.





## Methods and Materials

### Animals

The following experiments were carried out under protocols approved by the Institutional Animal Care Committee of the Clinical Research Institute of Montreal. Male Long Evans hooded rats (weighing 275–375 g) were used in these studies. The rats were housed individually (catheterized rats) or in groups of 3 or 4 (no catheters), and had access to food and water at all times.

### Intrathecal Catheters

In animals that received intrathecal lidocaine, bupivacaine, artificial cerebrospinal fluid (CSF) or saline, chronic lumbar intrathecal catheters were implanted while rats were anesthetized with 65 mg/kg intraperitoneal sodium pentobarbital (Somnotol, MTC Pharmaceuticals, Cambridge, Ontario, Canada). The catheter (Intramedic PE-10 tubing, Clay Adams, Parsippany, NJ) was inserted through an incision in the dura mater at the atlantooccipital junction, and was positioned so that the inner end of the catheter lay at the lower lumbar (L4–L6) spinal level. The outer end of the catheter was fixed with dental cement to a screw embedded in the skull. The rats were allowed to recover for 4–6 days and only those animals that were free of any neurologic deficit were used in the experiments. The location of the inner end of the catheter was verified during postmortem examination.

### Formalin Test

Formalin-induced nociceptive behaviors were measured in rats that received an injection of 50  $\mu$ l of either 2.5, 3.75, or 5.0% formalin into the plantar surface of one hind paw. For nociceptive testing, each rat was placed in a 30 cm  $\times$  30 cm  $\times$  30 cm methyl methacrylate polymer box with a mirror below the floor at a 45° angle to allow an unobstructed view of the paws. A nociceptive score was determined using the weighted scores method of behavioral rating devised by Dubuisson and Dennis.<sup>35</sup> Briefly, this involved the measurement of the time spent in each of four behavioral categories: (0) the injected paw is not favored, (1) the injected paw has little or no weight on it, (2) the injected paw is elevated and is not in contact with any surface, and (3) the injected paw is licked, bitten, or shaken. A weighted average nociceptive score, ranging from 0 to 3, was calculated by multiplying the time spent in each category by the category weight, summing

these products, and then dividing by the total time of the test. Concentrations of formalin ranging from 2.5 to 5.0% are routinely used in the formalin test, as is the 50- $\mu$ l volume.

### Plasma Extravasation

The degree of peripheral inflammation produced by various concentrations of formalin was assessed by measuring plasma extravasation in the hind paw of untreated rats and rats injured by subcutaneous injection of saline or 2.5, 3.75, and 5.0% formalin into the plantar surface of the hind paw. To measure plasma extravasation, rats were given an intravenous (tail vein) injection of Evans Blue dye (50 mg/kg in 2.5 ml/kg) 30 min before the hind paw injury. Rats were then killed 45 min after the formalin injection by overdose of 200 mg/kg intraperitoneal sodium pentobarbital. After intracardiac perfusion with 0.9% saline to flush blood from the circulation, the hind paws of untreated and injured rats were removed by amputation at the ankle joint. The hind paws were then incubated in 4 ml formamide at 70°C for 24 h to extract Evans blue dye from the tissue. After cooling to room temperature, plasma extravasation was recorded as the absorbance of the resulting supernatant in a spectrophotometer at a wavelength of 620 nm.

### Knee Joint Injury

Rats were given an injection of 100  $\mu$ l 5.0% formalin into the knee joint while anesthetized with 3% halothane. Preliminary investigations demonstrated that this volume of 5.0% formalin produced flinching responses in lightly anesthetized rats for about 60–70 min, followed by a persistent inflammation in the rat knee joint during a prolonged postinjury period (2–3 days). To approximate the events during surgery in which patients are anesthetized when the most intense tissue injury and afferent barrage occurs, rats were deeply anesthetized with halothane before and for 45 min after the knee injury. Rats typically recovered from the halothane anesthesia between 25 and 30 min after its termination (*i.e.*, 70–75 min postformalin).

Nociceptive assessment began 30 min after termination of the halothane anesthesia (*i.e.*, 75 min postformalin), and was additionally performed at 1, 2, 4, 24, and 48 h. Nociception during this postinjury inflammatory period is relatively static over prolonged periods, and thus a nociceptive score can be generated by observing the rats and recording their behaviors over a brief (5 min) time period at each time point. Noci-

ceptive behaviors during the postinjury inflammatory period were assessed on a 5-point behavioral scale, which was defined as follows: 0 = equal weight on both hind paws; 1 = paw is completely on the floor but the toes are not spread; 2 = foot is curled with only some parts of the foot lightly touching the floor; 3 = foot is completely elevated; 4 = the rat licks the injured knee or any other part of the hind limb. The experimenter, who was unaware of the treatment condition, recorded the highest nociceptive behavior observed during a 5-min period at the given observation time.

#### Procedure

**Experiment 1. Assessment of the Effect of Intrathecal Lidocaine on Nociceptive Responses to Different Concentrations of Formalin.** The first experiment examined the influence of peripheral inflammation on the ability of spinal anesthesia to preempt nociceptive behaviors in the formalin test in a total of 12 groups of rats. Formalin-induced nociceptive responses were measured in six groups of rats that received intrathecal lidocaine either 5 min before or 5 min after a subcutaneous injection of 50  $\mu$ l of either 2.5, 3.75, or 5.0% (preformalin and postformalin groups) formalin into the plantar surface of one hind paw. Spinal anesthesia was produced by administering a large bolus (30  $\mu$ l) of 2.0% lidocaine through the chronic intrathecal catheter, followed by 10  $\mu$ l artificial CSF (an aqueous solution of 128.6 mM NaCl, 2.6 mM KCl, 1.0 mM MgCl<sub>2</sub>, and 1.4 mM CaCl<sub>2</sub>, phosphate buffered to pH 7.33) to flush the catheter, while rats were briefly hand-held. Preliminary experiments indicated that spinal lidocaine produces a complete anesthetic blockade between 2 and 7 min, with partial effects lasting until 20 min posttreatment. Another six groups of rats received CSF (30  $\mu$ l, intrathecal) 5 min before or after subcutaneous injection of 2.5, 3.75, or 5.0% formalin. Nociceptive testing was performed between 30 and 60 min after formalin injection during the stable tonic late phase of the formalin test. The goal was to assess the limits of the preemptive effects of spinal anesthesia with increasing degrees of peripheral inflammation produced by higher concentrations of formalin.

Further studies were performed to confirm that higher concentrations of formalin do indeed produce a greater degree of peripheral inflammation. Thus, additional rats ( $n = 4$ /group) were assessed for the degree of plasma extravasation within the hind paw after subcutaneous

administration of either saline, 2.5, 3.75, or 5.0% formalin. The injected hind paw was removed and assessed for Evans Blue dye leakage 45 min after injection of formalin or saline. This time corresponds to the halfway point in the testing of rats in experiment 1. The plasma extravasation produced by the three concentrations of formalin, or by saline, was compared with baseline plasma extravasation in uninjected hind paws of control rats.

**Experiment 2. Assessment of the Interactive Effects of Opioid and Barbiturate Supplements with Preinjury and Postinjury Spinal Blocks on Postinjury Nociceptive Responses.** A second experiment was performed to examine the influence of opioid and barbiturate supplements on the ability to detect differences in preinjury and postinjury treatments with intrathecal bupivacaine in an animal model of postoperative pain that involved injury of deep tissue in the rat knee joint. Rats were randomly assigned to one of five treatment groups that received combinations of the treatments pentobarbital (13 mg/kg intraperitoneal) and morphine (0.5 mg/kg intravenous), followed by preinjury or postinjury treatment with bupivacaine (30  $\mu$ l 0.5% intrathecal), or appropriate vehicle control treatments, in addition to general inhalation anesthesia with 2.0–3.0% halothane. The 0.5-mg/kg dose of morphine was chosen because this dose has been found to inhibit the sensitization of the dorsal horn neurons in response to electrical activation of C-fibers.<sup>37</sup> The 13-mg/kg dose of pentobarbital was chosen to produce sedation; although subanesthetic, this dose is higher than the levels of pentobarbital that have been found to produce hyperalgesia, or reverse the antinociceptive effects of morphine in rats.<sup>38–40</sup> Preliminary experiments indicated that spinal bupivacaine produces a complete anesthetic blockade between 5 and 25 min, with partial effects lasting until 45 min posttreatment. The procedure was designed so that the rats received: (1) intraperitoneal pentobarbital or saline ~45 min before the injury; (2) halothane inhalation beginning ~35 min before injury and continuing until 45 min after injury; (3) intravenous (tail vein injection) morphine or saline ~25 min before injury; (4) intrathecal bupivacaine 5 min before injury and intrathecal saline 5 min after injury (pretreatment group) or intrathecal saline 5 min before and intrathecal bupivacaine 5 min after injury (posttreatment group); and (5) a knee joint injection of 100  $\mu$ l 5.0% formalin. Specifically, the five treatment groups received intraperitoneal/intravenous/intrathecal/intrathecal injections of either: (1) saline/

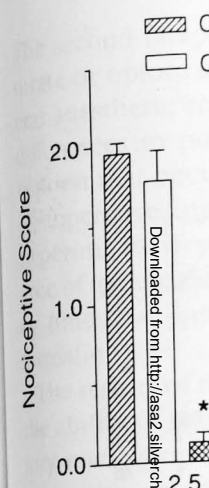

Fig. 1. Nociceptive paw injection of formalin (5.0%) or lidocaine (2.0%) (n = 8, 8, 7 or lidocaine-pre respectively) or 5.0% formalin (n = 10, 8, 6 for 2.5, 3.75, 5.0% formalin injection). Analysis of treatment (F(3,7) = 27.9, P < 0.001). Significant difference between fluid pre and post groups is indicated by an asterisk (\*P < 0.05).

saline/saline/saline; (3) pentobarbital/morphine/pentobarbital/morphine/pentobarbital/morphine.

#### Data Analysis

Nociceptive scores were averaged over the three groups using multiple comparisons (Tukey's tests). Means were compared across groups using analysis of variance, followed by post hoc comparisons of nociceptive scores in each group at each time point, followed by analysis of ranks, followed by analysis of variance.

#### Results

##### Experiment 1. Nociceptive Responses to Different Concentrations of Formalin



## INFLAMMATION, ANESTHETIC REGIMEN, AND PREEMPTIVE ANALGESIA

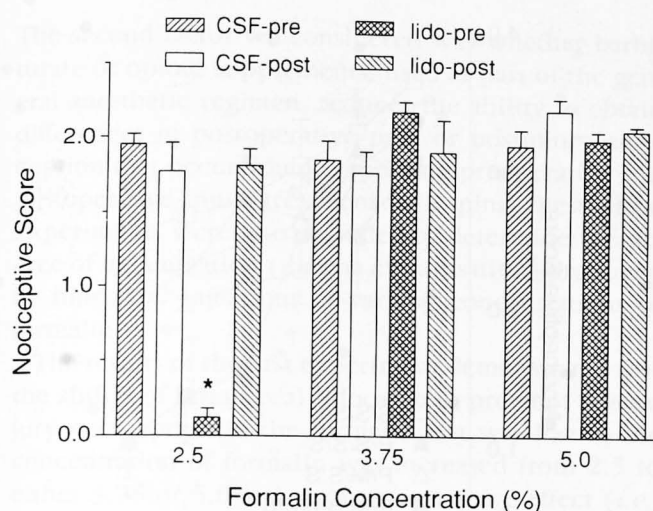

Fig. 1. Nociceptive scores ( $\pm$ SEM) in response to a 50- $\mu$ l hind paw injection of formalin in rats given intrathecal cerebrospinal fluid or lidocaine (30  $\mu$ l, 2.0%) 5 min before (CSF-pre,  $n = 8, 8, 7$  or lido-pre,  $n = 9, 12, 10$  for 2.5, 3.75 and 5.0% formalin, respectively) or 5 min after (CSF,  $n = 6, 6, 6$  or lido-post,  $n = 10, 8, 6$  for 2.5, 3.75 and 5.0% formalin, respectively) the formalin injection. Analysis of variance reveals a significant effect of treatment ( $F(3,77) = 22.6, P < 0.001$ ) and formalin concentration ( $F(2,77) = 47.1, P < 0.001$ ), as well as a significant treatment  $\times$  formalin concentration interaction ( $F(6,77) = 27.9, P < 0.001$ ). Significant differences from the cerebrospinal fluid pre and post group for each concentration are indicated by an asterisk (\* $P < 0.05$ , Newman Keuls).

saline/saline/saline; (2) pentobarbital/saline/saline/saline; (3) pentobarbital/morphine/saline/saline; (4) pentobarbital/morphine/bupivacaine/saline; or (5) pentobarbital/morphine/saline/bupivacaine.

#### Data Analyses

Nociceptive scores for each rat in experiment 1 were averaged over the 30-min test period and compared across groups using one-way analysis of variance. Multiple comparisons were performed using Newman Keuls tests. Measures of plasma extravasation were compared across groups using one-way analysis of variance, followed by Newman Keuls comparisons. Nociceptive scores in experiment 2, were compared across groups at each time point using Kruskal Wallis analysis of ranks, followed by Mann Whitney  $U$  tests.

### Results

#### Experiment 1. Effect of Intrathecal Lidocaine on Nociceptive Responses to Different Concentrations of Formalin.

Figure 1 illustrates the effects of

increasing concentrations of formalin in rats given CSF or lidocaine intrathecally before or after formalin treatment. For rats pretreated or posttreated with CSF, there was no significant change in nociceptive responses to formalin as the concentration was increased from 2.5 to 5.0% ( $P > 0.05$ ). Similarly, there was no significant effect of increasing the concentration of formalin in rats given lidocaine 5 min after formalin ( $P > 0.05$ ). When rats were given lidocaine 5 min before formalin, nociceptive responses to 2.5% formalin were significantly decreased compared with rats pretreated with CSF ( $P < 0.05$ ). When the concentration of formalin was increased to 3.75 or 5.0%, there was a reduction in the ability of the preinjury lidocaine treatment to reduce nociceptive responses. In rats pretreated with lidocaine, the nociceptive responses to 3.75 and 5.0% formalin were significantly greater than the responses to 2.5% formalin ( $P < 0.05$ ).

Figure 2 illustrates the degree of plasma extravasation in the hind paws of untreated rats and rats given a hind paw injection of saline or 2.5, 3.75, or 5.0% formalin. Plasma extravasation was reflected by the spectrophotometric measurement of the absorbance at 620 nm of the Evans blue dye extracted from the hind paw. Untreated control rats had a mean ( $\pm$ SEM) absorbance

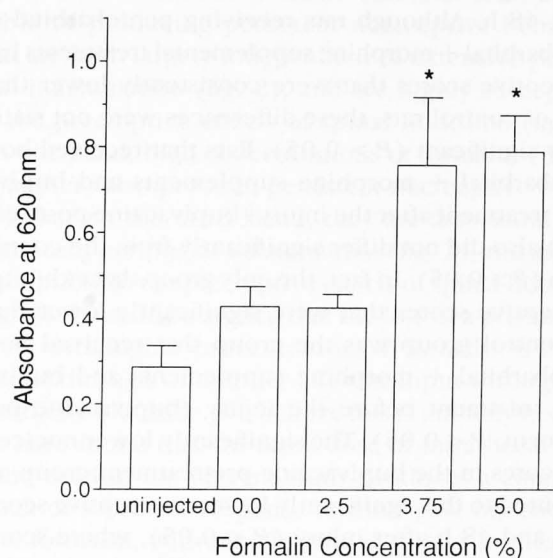

Fig. 2. Plasma extravasation measured as absorbance of Evans Blue dye at 620 nm from one hind paw of uninjected control rats, and in rats with a hind paw injection of 50  $\mu$ l of either saline (0.0% formalin), or 2.5, 3.75, or 5.0% formalin ( $n = 4$  for each group). Analysis of variance reveals a significant effect of treatment ( $F(4,15) = 6.6, P < 0.01$ ). Significant differences from the saline control group are indicated by asterisks (\* $P < 0.05$ , Newman Keuls).

measurement of  $0.29 \pm 0.05$  at 620 nm. Hind paw plasma extravasation was not significantly affected, as compared with untreated control rats, in rats given a hind paw injection of either saline (absorbance at 620 nm =  $0.43 \pm 0.05$ ) or 2.5% formalin (absorbance at 620 nm =  $0.43 \pm 0.03$ ;  $P > 0.05$ ). In contrast, hind paw plasma extravasation was significantly increased, as compared with untreated control rats and also saline-treated rats, in rats given 3.75 or 5.0% formalin (absorbance at 620 nm =  $0.76 \pm 0.16$  for 3.75% formalin, and  $0.79 \pm 0.09$  for 5.0% formalin;  $P < 0.05$ ).

**Experiment 2. Interactive Effects of Opioid and Barbiturate Supplements with Preinjury and Postinjury Spinal Blocks on Postinjury Nociceptive Responses.** Figure 3 illustrates the nociceptive responses to knee injection of formalin in rats given intraperitoneal/intravenous/intrathecal/intrathecal treatments with: (1) saline/saline/saline/saline, (2) pentobarbital/saline/saline/saline, (3) pentobarbital/morphine/saline/saline, (4) pentobarbital/morphine/bupivacaine/saline (preinjury bupivacaine group), or (5) pentobarbital/morphine/saline/bupivacaine (postinjury bupivacaine group). Control rats given only saline treatments had relatively high nociceptive scores that decreased gradually over the 48 h of measurement from a high of  $3.6 \pm 0.2$  at 30 min to a low of  $2.5 \pm 0.4$  at 48 h. Although rats receiving pentobarbital or pentobarbital + morphine supplemental treatments had nociceptive scores that were consistently lower than those of control rats, these differences were not statistically significant ( $P > 0.05$ ). Rats that received both pentobarbital + morphine supplements and bupivacaine treatment after the injury (bupivacaine posttreatment) also did not differ significantly from the control group ( $P > 0.05$ ). In fact, the only group that exhibited nociceptive scores that were significantly lower than the control group was the group that received both pentobarbital + morphine supplements and bupivacaine treatment before the injury (bupivacaine pretreatment;  $P < 0.05$ ). The significantly lower nociceptive scores in the bupivacaine pretreatment group are attributed to the significantly lower nociceptive scores at 24 and 48 h after injury ( $P < 0.05$ ), where scores ranged from  $1.5 \pm 0.21$  to  $1.0 \pm 0.26$ , as opposed to  $2.62 \pm 0.37$  to  $2.5 \pm 0.42$  for the control group during the same period. Importantly, although the bupivacaine pretreatment group had nociceptive scores that were significantly lower than the control group, their scores were not significantly different from the nociceptive scores of rats in the bupivacaine posttreatment group

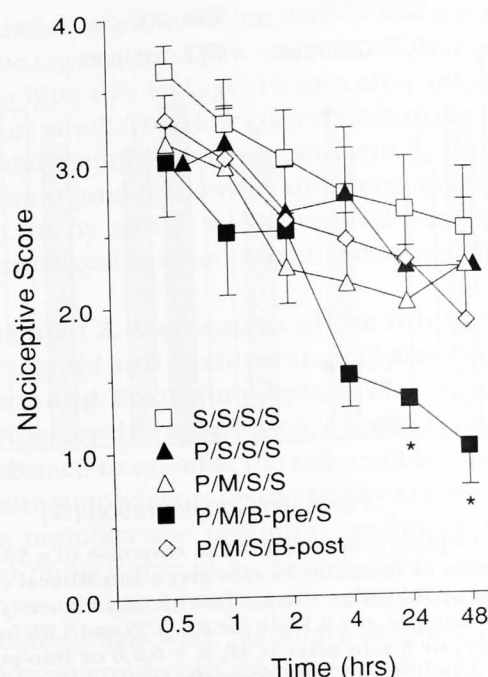

**Fig. 3.** Time course of the nociceptive scores ( $\pm$  SEM) of rats given a knee joint injection of 100  $\mu$ l 5.0% formalin and treated with intraperitoneal/intravenous/intrathecal/intrathecal injections of (1) saline/saline/saline/saline (S/S/S/S,  $n = 8$ ), (2) pentobarbital/saline/saline/saline (P/S/S/S,  $n = 8$ ), (3) pentobarbital/morphine/saline/saline (P/M/S/S,  $n = 8$ ), (4) pentobarbital/morphine/bupivacaine/saline (P/M/B-pre/S,  $n = 6$ ), or (5) pentobarbital/morphine/saline/bupivacaine (P/M/S/B-post,  $n = 7$ ), in addition to halothane inhalation anesthesia extending from 35 min before injury until 45 min after injury. All treatments were pretreatments except the final intrathecal injection which followed the formalin injection (see Methods). Time is measured from the cessation of the halothane anesthesia which was 45 min after the formalin injection. Significant differences from the S/S/S/S control group are indicated by asterisks (\* $P < 0.05$ , Mann Whitney  $U$  test).

( $P > 0.05$ ). At the same time, the posttreatment bupivacaine group did not differ significantly from any of the other groups, including the control group or the groups that received pentobarbital or pentobarbital + morphine supplements ( $P > 0.05$ ).

## Discussion

The current study examined, in experimental models in rats, two critical factors that have been proposed to influence the effectiveness of preemptive analgesia. The first factor we considered was whether continued afferent inputs driven by inflammatory processes in the injured tissue override the contribution of a sensitization of central neurons to postoperative pain in humans, or in this case postinjury nociception in animals.

The second factor...  
turate or opioid su...  
eral anesthetic reg...  
differences in pos...  
ception that occur...  
postoperative/inju...  
Experiments were...  
gree of inflammati...  
by hind paw injec...  
formalin.

The results of th...  
the ability of intra...  
jury nociception...  
concentration of...  
either 3.75 or 5.0...  
a significant educ...  
lidocaine was ob...  
This preemptive...  
cantly higher no...  
and 5.0% formali...  
jection of 3.75 a...  
cant degree of inf...  
contrast, the degre...  
formalin was not...  
duced by the sa...  
slightly, but not...  
at all. Thus the...  
docaine are grea...  
mation, and they...  
peripheral inflan...  
may be difficult...  
preemptive anal...  
surgery, which i...  
inflammatory ch...  
changes and affe...  
tive inflammation...  
eficial effects of...  
time of surgery.

Our data on th...  
extravasation pr...  
sistent with, and...  
in this area. It h...

§ Yashpal K, Code...  
on noxious stimuli...  
1995, manuscript in...

|| Chapman V, Di...  
post-treatment of lig...  
rat dorsal horn neuro...  
Seattle, IASP Publica...



## INFLAMMATION, ANESTHETIC REGIMEN, AND PREEMPTIVE ANALGESIA

The second factor we considered was whether barbiturate or opioid supplements, used as part of the general anesthetic regimen, reduces the ability to obtain differences in postoperative pain or postinjury nociception that occur when comparing preoperative and postoperative/injury treatment with spinal anesthetics. Experiments were also included to determine the degree of inflammation (plasma extravasation) produced by hind paw injections of varying concentrations of formalin.

The results of the first experiment demonstrated that the ability of intrathecal lidocaine to preempt postinjury nociception in the formalin test was lost as the concentration of formalin was increased from 2.5 to either 3.75 or 5.0%. A strong preemptive effect (*i.e.*, a significant reduction in nociceptive scores) of spinal lidocaine was obtained in rats given 2.5% formalin. This preemptive effect was lost (resulting in significantly higher nociceptive scores) in rats given 3.75 and 5.0% formalin. Furthermore, it was shown that injection of 3.75 and 5.0% formalin produced a significant degree of inflammation (plasma extravasation). In contrast, the degree of inflammation produced by 2.5% formalin was not significantly different from that produced by the same volume of saline, and was only slightly, but not significantly higher than no injection at all. Thus, the preemptive effects of intrathecal lidocaine are greatest when there is little or no inflammation, and they decrease directly with increases in peripheral inflammation. These results suggest that it may be difficult to demonstrate a significant effect of preemptive analgesia in patients undergoing major surgery, which is accompanied by considerable local inflammatory changes. The peripheral inflammatory changes and afferent input associated with postoperative inflammation may progressively override the beneficial effects of blocking the afferent barrage at the time of surgery.

Our data on the degree of inflammation or plasma extravasation produced by formalin injection is consistent with, and also extends, our current knowledge in this area. It has been previously demonstrated that

injection of between 4.0 and 5.0% formalin into a rat's hind paw produces an increase in paw volume of approximately 30–35% 1 h after injection.<sup>41,42</sup> Furthermore, injection of 5.0% formalin into a single rat toe produces about a 235% increase in plasma extravasation within the skin of the injected toe, over that of an injection of an H<sub>2</sub>O vehicle.<sup>43</sup> The current data indicate that after 45 min, injections of either 3.75 or 5.0% formalin produce an approximate 175–185% increase in plasma extravasation in the rat hind paw over that of an injection of a saline vehicle. In contrast, there was no difference whatsoever in plasma extravasation produced by injection of 2.5% formalin (the concentration for which preemptive spinal lidocaine was most effective) as compared with a control injection of saline (absorbance at 620 nm was 0.43 for both groups). It should be pointed out that a concentration of 2.5% formalin is commonly used in the formalin test, and produces a high degree of nociceptive responses that follow the typical persistent and biphasic time course seen with higher concentrations of formalin. Although saline produced a similar degree of plasma extravasation as 2.5% formalin, a saline injection produces minimal nociceptive responses, which for most rats last only 1–2 min after injection.<sup>44,45</sup> Thus, it appears that low concentrations of formalin (2.5% or less) are capable of producing persistent nociceptive behaviors that are both largely independent of extensive peripheral inflammation (fig. 2), and are highly susceptible to the preemptive effects of spinal lidocaine (fig. 1). On one hand, high concentrations of formalin (3.75% or higher) also produce persistent nociceptive behaviors, but on the other hand, they are associated with significant peripheral inflammation (fig. 2), and are less susceptible to the preemptive effects of spinal lidocaine (fig. 1). It could be argued that the loss of a preemptive effect with higher concentrations of formalin is due to a breakthrough of a larger afferent input through the anesthetic blockade. We believe this is unlikely because we have found that the same dose of intrathecal lidocaine used in the current study produces a complete block of a pressor response to hind paw injection of 10% formalin, without affecting increases in mean arterial pressure in response to forepaw injection of 10% formalin.<sup>§</sup>

The suggestion that responses to high concentrations of formalin depend more on peripheral inflammation than central sensitization may explain the recent finding that there is no difference between pretreatment and posttreatment with intrathecal lidocaine<sup>||</sup> or excitatory

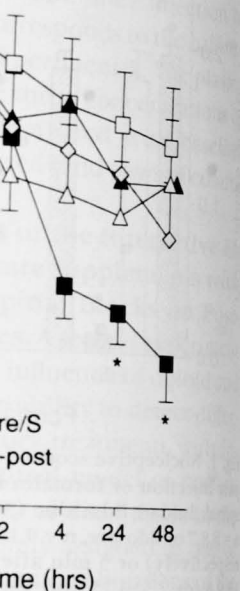

Figure 1. Nociceptive scores (± SEM) of rats given 5.0% formalin and treated with intrathecal saline (S/S/S/S, n = 8), (2) pentobarbital (P/S/S/S, n = 8), (3) pentobarbital + lidocaine (P/M/S/S, n = 8), (4) pentobarbital + lidocaine + bupivacaine (P/M/B-pre/S, n = 8). The scores for groups 3 and 4 are significantly lower than groups 1 and 2. Asterisks (\*) indicate significant differences from the control group (see Methods).

the posttreatment bupivacaine was not significantly different from any of the control group or the pentobarbital or pentobarbital + bupivacaine (0.05).

in experimental models have been proposed to preempt analgesia. The whether continued afferent input in the contribution of a sensitized postoperative pain in human nociception in animals.

§ Yashpal K,Coderre TJ, Henry JL: Effects of intrathecal lidocaine on noxious stimulus-induced changes in cardiovascular function, 1995, manuscript in preparation.

|| Chapman V, Dickenson AH: The effect of intrathecal pre and post-treatment of lignocaine or CNQX on the formalin response of rat dorsal horn neurons. Abstracts of the 7th World Congress on Pain, Seattle, IASP Publications. 1993, p 469





## INFLAMMATION, ANESTHETIC REGIMEN, AND PREEMPTIVE ANALGESIA

ment or preinjury *versus* postinjury spinal anesthetic blocks (with and without supplemental barbiturate and opioid treatments), the current results also provide experimental evidence that the use of barbiturate and opioid supplemental treatments may obscure the ability to detect differences between preinjury and postinjury (or preemptive *vs.* postsurgical) treatments on postinjury nociception (or postoperative pain).

The authors thank Douglas Jolivet, for technical assistance on experiment 2, and Dr. James L. Henry, for reviewing the manuscript.

## References

1. Jebeles JA, Reilly JS, Guitierrez JF, Bradley EL, Kissin I: The effect of pre-incisional infiltration of tonsils with bupivacaine on the pain following tonsillectomy under general anesthesia. *Pain* 1991; 47:305-8
2. Ringrose NH, Cross MJ: Femoral nerve block in knee joint surgery. *Am J Sports Med* 1984; 12:398-402
3. Tuffin JR, Cunliffe DR, Shaw SR: Do local analgesics injected at the time of third molar removal under general anesthesia reduce significantly postoperative analgesic requirements? A double-blind controlled trial. *Br J Oral Maxillofacial Surg* 1989; 27:27-32
4. Tverskoy M, Cozacov C, Ayache M, Bradley EL, Kissin I: Postoperative pain after inguinal herniorrhaphy with different types of anesthesia. *Anesth Analg* 1990; 70:29-35
5. Katz J, Clairoux M, Kavanagh BP, Roger S, Nierenberg H, Redahan C, Sandler AN: Pre-emptive lumbar epidural anaesthesia reduces postoperative PCA morphine consumption after lower abdominal surgery. *Pain* 1995; 59:395-403
6. Buggedo GJ, Cárcamo CR, Mertens RA, Dagnino JA and Munoz HR: Pre-operative percutaneous Ilioinguinal and Iliohypogastric nerve block with 0.5% bupivacaine for post-herniorrhaphy pain management in adults. *Reg Anesth* 1990; 15:130-3
7. Campbell WI, Kendrick R, Patterson C: Intravenous diclofenac sodium. Does its administration before operation suppress postoperative pain? *Anaesthesia* 1990; 45:763-6
8. Kiss IE, Kilian M: Does opiate pre-medication influence postoperative analgesia? A prospective study. *Pain* 1992; 48:157-8
9. McQuay HJ, Carroll D, Moore RA: Post-operative orthopaedic pain—the effect of opiate pre-medication and local anaesthetic blocks. *Pain* 1988; 33:291-5
10. Richmond CE, Bromley LM, Woolf CJ: Preoperative morphine pre-empts postoperative pain. *Lancet* 1993; 342:73-5
11. Woolf CJ, Chong M-S: Preemptive analgesia—treating postoperative pain by preventing the establishment of central sensitization. *Anesth Analg* 1993; 77:362-79
12. Wall, PD: The prevention of post-operative pain. *Pain* 1988; 33:289-90
13. Hylden JLK, Nahin RL, Traub RJ, Dubner R: Expansion of receptive fields of spinal lamina 1 projection neurones in rats with unilateral adjuvant-induced inflammation: The contribution of dorsal horn mechanisms. *Pain* 1989; 37:229-43
14. Kenshalo DR Jr, Leonard RB, Chung JM, Willis WD: Responses of primate spinothalamic neurons to graded and to repeated noxious heat stimuli. *J Neurophysiol* 1979; 42:1370-89
15. McMahon SB, Wall PD: Receptive fields of rat lamina 1 projection cells move to incorporate a nearby region of injury. *Pain* 1984; 19:235-47
16. Perl ER: Sensitization of nociceptors and its relation to sensation. *Advances in Pain Research and Therapy*. Volume 1. Edited by Bonica JJ, Albe-Fessard D. New York, Raven Press, 1976, p 17
17. Simone DA, Sorkin LS, Oh U, Chung JM, Owens C, LaMotte RH, Willis WD: Neurogenic hyperalgesia: Central neural correlates in responses of spinothalamic tract neurons. *J Neurophysiol* 1991; 66:228-46
18. Woolf CJ, King AE: Dynamic alterations in the cutaneous mechanoreceptive fields of dorsal horn neurons in the rat spinal cord. *J Neurosci* 1990; 10:2717-26
19. Dahl JB: Neuronal plasticity and pre-emptive analgesia: Implications for the management of postoperative pain. *Dan Med Bull* 1994; 41:434-42
20. Katz J: Pre-emptive analgesia: Evidence, current status and future directions. *Eur J Anaesthesiol* 1995; 12(suppl 10):8-13
21. Ejlersen E, Bryde-Anderson H, Eliassen K, Mogensen T: A comparison between preincisional and postincisional lidocaine infiltration and postoperative pain. *Anesth Analg* 1992; 74:495-8
22. Katz J, Kavanagh BP, Sandler AN, Nierenberg H, Boylan JF, Friedlander M, Shaw BF: Preemptive analgesia: Clinical evidence of neuroplasticity contributing to postoperative pain. *ANESTHESIOLOGY* 1992; 77:439-46
23. Dahl JB, Hansen BL, Hjortso NC, Erichsen CJ, Moiniche S, Kehlet H: Influence of timing on the effect of continuous extradural analgesia with bupivacaine and morphine after major abdominal surgery. *Br J Anaesth* 1992; 69:4-8
24. Dierking GW, Dahl JB, Kanstrup J, Dahl A, Kehlet H: Effect of pre- vs postoperative inguinal field block on postoperative pain after herniorrhaphy. *Br J Anaesth* 1992; 68:344-8
25. Pryle BJ, Vanner RG, Enriquez N, Reynolds F: Can pre-emptive lumbar epidural blockade reduce post-operative pain following lower abdominal surgery? *Anaesthesia* 1993; 48:120-3
26. Rice LJ, Pudimat MA, Hannallah RS: Timing of caudal block placement in relation to surgery does not affect duration of postoperative analgesia in paediatric ambulatory patients. *Can J Anaesth* 1990; 37:429-31
27. Katz J, Kavanagh BP, Sandler AN: Does pre-operative fentanyl administration influence post-operative pain? *Pain* 1992; 51:123-4
28. Katz J, Kavanagh BP, Clairoux M, Sandler AN: Pre-emptive analgesia. *Br J Anaesth* 1993; 70:378-84
- 29.Coderre TJ, Katz J, Vaccarino AL, Melzack R: Contribution of central neuroplasticity to pathological pain: Review of clinical and experimental evidence. *Pain* 1993; 52:259-85
30. Coderre TJ, Vaccarino AL, Melzack R: Central nervous system plasticity in the tonic pain response to subcutaneous formalin injection. *Brain Res* 1990; 535:155-8
31. Abram SE, Yaksh TL: Morphine, but not inhalation anesthesia, blocks post-injury facilitation: The role of preemptive suppression of afferent transmission. *ANESTHESIOLOGY* 1993; 78:713-21
32. Abram SE, Yaksh TL: Systemic lidocaine blocks nerve injury-induced hyperalgesia and nociceptor-driven spinal sensitization in the rat. *ANESTHESIOLOGY* 1994; 80:383-91
33. Goto T, Marota JJA, Crosby G: Nitrous oxide induces preemptive analgesia in the rat that is antagonized by halothane. *ANESTHESIOLOGY* 1994; 80:409-16

34. Goto T, Marota JJA, Crosby G: Pentobarbitone, but not propofol, produces pre-emptive analgesia in the rat formalin model. *Br J Anaesth* 1994; 72:662-7
35. Dubuisson D, Dennis SG: The formalin test: A quantitative study of the analgesic effects of morphine, meperidine, and brain stimulation in rats and cats. *Pain* 1977; 4:161-74
36. Dickenson AH, Sullivan AF: Subcutaneous formalin-induced activity of dorsal horn neurons in the rat: Differential response to an intrathecal opiate administration pre or post formalin. *Pain* 1987; 30:349-60
37. Woolf CJ, Wall PD: Morphine-sensitive and morphine-insensitive actions of C-fibre input on the rat spinal cord. *Neurosci Lett* 1986; 64:221-5
38. Geller EB, Durlinsky L, Cowan A, Harakal C, Adler MW: The effect of pentobarbital on the antinociceptive action of morphine in morphine-tolerant and non-tolerant rats. *Life Sci* 1979; 25:139-46
39. Kissin I, Jebeles JA: Halothane antagonizes effect of morphine on the motor reaction threshold in rats. *ANESTHESIOLOGY* 1984; 61: 671-6
40. Ewen A, Archer DP, Samanani N, Roth SH: Hyperalgesia during sedation: Effects of barbiturates and propofol in the rat. *Can J Anaesth* 1995; 42:532-40
41. Brown JH, Kissel JW, Lish PM: Studies on the acute inflammatory response. I. Involvement of the central nervous system in certain models of inflammation. *J Pharmacol Exp Ther* 1968; 160: 231-42
42. Wheeler-Aceto H, Cowan A: Neurogenic and tissue-mediated components of formalin-induced edema: Evidence for supraspinal regulation. *Agents Actions* 1991; 34:264-9
43. Haley J, Ketchum S, Dickenson AH: Peripheral  $\kappa$ -opioid modulation of the formalin response: An electrophysiological study in the rat. *Eur J Pharmacol* 1990; 191:437-46
44. Wheeler-Aceto H, Porreca F, Cowan A: The rat paw formalin test: Comparison of noxious agents. *Pain* 1990; 40:229-38
45. Coderre TJ, Fundytus MF, McKenna J, Dahl S, Melzack R: The formalin test: A validation of the weighted-scores method of behavioural pain rating. *Pain* 1993; 54:43-50
46. Chapman V, Haley JE, Dickenson AH: Electrophysiologic analysis of preemptive effects of spinal opioids on N-methyl-D-aspartate receptor-mediated events. *ANESTHESIOLOGY* 1994; 81:1429-35
47. Murray CW, Cowan A, Larson AA: Neurokinin and NMDA antagonists (but not a kainic acid antagonist) are antinociceptive in the mouse formalin model. *Pain* 1991; 44:179-85
48. Dickenson AH, Sullivan AF: Peripheral origins and central modulation of subcutaneous formalin-induced activity of rat dorsal horn neurones. *Neurosci Lett* 1987; 83:207-11
49. Haley JE, Sullivan AF, Dickenson AH: Evidence for spinal N-methyl-D-aspartate receptor involvement in prolonged chemical nociception in the rat. *Brain Res* 1990; 518:218-26
50. Hardy PAJ: Pre-emptive extradural analgesia. *Br J Anaesth* 1993; 70:493.

## Influence of Pre-emptive Analgesia on Carrageenan-Induced Edema

D. Fletcher, M.D.,\*

**Background:** The effect of administration of bupivacaine on the efficacy of preemptive analgesia is still under investigation.

**Methods:** The effect of carrageenan-induced edema on the administration of bupivacaine (0.005 mg/ml) on edema, and on the administration of bupivacaine (0.005 mg/ml) 60 min after carrageenan (1% solution) was studied in groups (n = 5) in the rat paw. The paw pressure was measured with a thread and planimeter. After injection of bupivacaine (0.005 mg/ml) series (n = 2), with carrageenan at 24 h.

This article is accepted for publication in *ANESTHESIOLOGY* 1996; 84:1129-37.

\* Département d'Anesthésie, Hôpital de la Pitié-Salpêtrière, Paris, France.

† Unité de Physiologie, Hôpital de la Pitié-Salpêtrière, Paris, France.

Received from the Hôpital de la Pitié-Salpêtrière, and the Unité de Physiologie, Hôpital de la Pitié-Salpêtrière, Paris, France, 1995. Accepted for publication by the American Society of Anesthesiologists and the British Society of Anaesthetists. Presented in part at the 1995 Annual Meeting of the Society for Neuroscience, Association in Vienna, Austria.

Address reprint requests to Dr. Fletcher, Unité de Physiologie du Système Nerveux, INSERM, Hôpital de la Pitié-Salpêtrière, 75014, Paris, France.

Anesthesiology, V 84, No 5, May 1996
